# Supplementary material
Source: PubMed Central journal article supplement (PMC5704477)
Supplement: 10.1074_M117.793117_jbc.M117.793117-1.pdf [file 10.1074_M117.793117_jbc.M117.793117-1.pdf]

**Table S1. List of primer sequences.**

|                                |              |                       |
|--------------------------------|--------------|-----------------------|
| human RT KLF7                  | hKlf7 rt F   | CTCATGGGAGGGATGTGAGT  |
| human RT KLF7                  | hKlf7 rt R   | ACTCTGGCCTTTTCGGTTTTT |
| human RT KLF4                  | hKlf4 rt F   | CACCTGGCGAGTCTGACAT   |
| human RT KLF4                  | hKlf4 rt R   | AGTCGCTTCATGTGGGAGAG  |
| mouse RT KLF4                  | mRT Klf4 F   | GGCGAGTCTGACATGGCTG   |
| mouse RT KLF4                  | mRT Klf4 R   | GCTGGACGCAGTGTCTTCTC  |
| mouse RT KLF7                  | mKlf7 RT F   | TTGCTCTCTCGGGACAAGTT  |
| mouse RT KLF7                  | mKlf7 RT R   | GAGCTGAGGGAAGCCTTCTT  |
| Astigmatism SNP ChIP primer    | Astig SNP F  | CTTGAGGCCGGGAATTTGAG  |
| Astigmatism SNP ChIP primer    | Astig SNP R  | TGGCATGGTCATAGCTCACT  |
| Astigmatism SNP ChIP primer- 2 | Astig SNP 1F | GTCATTCAGGACCCAGCATG  |
| Astigmatism SNP ChIP primer- 2 | Astig SNP 1R | CTCAAATTCCCGGCCTCAAG  |
